# Supplementary material
Source: HighWire-hosted journal article supplement (doi:10.1101/rna.080341.124)
Supplement: Supplemental_Table_S1.xlsx [file Supplemental_Table_S1.xlsx]

## Sheet: Sheet1
Table S1. List of probes used in smFISH experiments
A. smFISH probes in detecting pre-snrpn
sm_pre-snrpn_1	atttgcccaaatcagcctta
sm_pre-snrpn_2	ttcagttaccctcggaaatc
sm_pre-snrpn_3	tctaccatagtttccctaac
sm_pre-snrpn_4	tcaggtcaagaggttaaaca
sm_pre-snrpn_5	gcagactctgacctaattca
sm_pre-snrpn_6	gagtattctgaccatagcat
sm_pre-snrpn_7	tgcagaagccaaccaattaa
sm_pre-snrpn_8	ccaagatttggtctaagact
sm_pre-snrpn_9	caactgttcttctccatttc
sm_pre-snrpn_10	ccaactcctcaaccatgaag
sm_pre-snrpn_11	aggataccaaatggcaacca
sm_pre-snrpn_12	aatgggaacagtgataggca
sm_pre-snrpn_13	tgttcctttgatgttacact
sm_pre-snrpn_14	taaagttctgtcctgcccta
sm_pre-snrpn_15	cctgatttcagacatctcac
sm_pre-snrpn_16	atccatgttgaactgtgtct
sm_pre-snrpn_17	gcataggcaaccaacaattg
sm_pre-snrpn_18	aaaaatcccctaatcccgaa
sm_pre-snrpn_19	atgaatcaccaactcctacc
sm_pre-snrpn_20	cctcttttataaacatacca
sm_pre-snrpn_21	ataccatggaggtatcttgt
sm_pre-snrpn_22	ccatgacacctatctcatat
sm_pre-snrpn_23	cagagatcacttctctccac
sm_pre-snrpn_24	agttctcagtattcttattc
sm_pre-snrpn_25	aggtttttaaatctcctcgg
sm_pre-snrpn_26	ctcctaaaccatatgctgtt
sm_pre-snrpn_27	gaccattttaagcagctagt
sm_pre-snrpn_28	tgggtaactttaatcaccca
sm_pre-snrpn_29	agttactcttgccaagagta
sm_pre-snrpn_30	ttctgttcactcaccactag
sm_pre-snrpn_31	cactgacatccaaaaagccc
sm_pre-snrpn_32	actgttgcaatgtacttctc
sm_pre-snrpn_33	cagggcgggaaacagtcaaa
B. smFISH probes in detecting SPAs
SPA1-5'-sm1	aagtctagtgaggcacactg
SPA1-5'-sm2	caatactacacctgccattt
SPA1-5'-sm3	ggtatctgagcaactagcaa
SPA1-5'-sm4	ttgtttccatctcaccaaat
SPA1-5'-sm5	ggtcgtctcatttttacaca
SPA1-5'-sm6	ctatactcactgtgttccat
SPA1-5'-sm7	ggcctagattctgatgagat
SPA1-5'-sm8	cgtatggagtcagatatcag
SPA1-5'-sm9	atggctgactacacggtata
SPA1-5'-sm10	ctcaaatgacctctatctgg
SPA1-5'-sm11	ggtagtaaacaagtgctggt
SPA1-5'-sm12	accaaataaccccaaaacca
SPA1-5'-sm13	atacttctacaacattcccc
SPA1-5'-sm14	cttattgtacaaccacctga
SPA1-5'-sm15	acccacacagatgatactga
SPA1-5'-sm16	ggcaagcaggcattgtgaaa
SPA1-5'-sm17	tctacactgtactagttctt
SPA1-5'-sm18	agccaagtttttcctactaa
SPA1-5'-sm19	tcggctcagcaaagcaaatt
SPA1-5'-sm20	tggacctcgctttttaagtt
SPA1-5'-sm21	cttgattcttgggcacttag
SPA1-5'-sm22	aagttcaaatgtgagcctcc
SPA1-5'-sm23	ctcaaggtcactgtattctc
SPA1-5'-sm24	cagcccgaacaattcagatg
SPA1-5'-sm25	caactcaatttttgctacca
SPA1-5'-sm26	attcctgatacatatctccg
SPA1-5'-sm27	gcacagtaatgcaatccaga
SPA1-5'-sm28	acttctctgacaagaaacca
SPA1-5'-sm29	aggattctgaaggaggtcta
SPA1-5'-sm30	ttaggactagagtacactga
SPA1-5'-sm31	tcgacaacttgctattctcc
SPA1-5'-sm32	atacactaatgccaccacag
SPA1-5'-sm33	ccactagcaaactgtccaaa
SPA1-5'-sm34	cgggtctcacagagctaaat
SPA1-5'-sm35	gaaggaaacaaacgcgggcg
SPA1-5'-sm36	gtgtcattcaaagcacacag
SPA1-5'-sm37	cctggcctggaagaataaat
SPA1-5'-sm38	tgtatctctacccataagga
SPA1-5'-sm39	atgtctttcccatcaactag
SPA1-5'-sm40	ccttagactgacagtaaggc
SPA1-5'-sm41	ccattatccttaacctgtac
SPA1-5'-sm42	gagacataccaatgcagtga
SPA1-5'-sm43	gctcctaagtacttattctc
SPA1-5'-sm44	tcatatagggttggaaccgg
SPA1-5'-sm45	cagtgacagaaacatgctca
SPA1-5'-sm46	atgccaaatggagaagctgc
SPA1-5'-sm47	gccacaaactagcaatttct
SPA1-5'-sm48	tctcctctcaaaccaatgtc
SPA1_mid1_sm1	acacagttgggaaaatggga
SPA1_mid1_sm2	tttttcagtcatcacctgag
SPA1_mid1_sm3	ggtacaaatagtggcacagt
SPA1_mid1_sm4	gcatttttagattttggtga
SPA1_mid1_sm5	agaatgtctccatacgtcat
SPA1_mid1_sm6	ggagtgtccactgaaacaaa
SPA1_mid1_sm7	tctcagttttttacatctgc
SPA1_mid1_sm8	ggtcactttccaaaagtgag
SPA1_mid1_sm9	ttcacttcaatgacactctt
SPA1_mid1_sm10	acaatcatcgtgcctactta
SPA1_mid1_sm11	tgatccaacagcaaccatga
SPA1_mid1_sm12	ataatgtctgtcattccagc
SPA1_mid1_sm13	ccactatcctgatttctttg
SPA1_mid1_sm14	aaagcactgagatgaagccc
SPA1_mid1_sm15	ttctatgtcctttgaattct
SPA1_mid1_sm16	gaagcagagaaaaggcactt
SPA1_mid1_sm17	cccccaaaaactacttatgt
SPA1_mid1_sm18	aaccacaggaatctgtccaa
SPA1_mid1_sm19	ttactagagtcatggggagt
SPA1_mid1_sm20	tctgatgtttgtacagcttt
SPA1_mid1_sm21	acagataactacacgggtca
SPA1_mid1_sm22	gtagccaattttacctggaa
SPA1_mid1_sm23	tggtaaggcaagttaacaga
SPA1_mid1_sm24	cactagcaatatccccaaat
SPA1_mid1_sm25	tttctacttccatatatcct
SPA1_mid1_sm26	acagtccaattgccaagtat
SPA1_mid1_sm27	tgacctaaggggattgcaat
SPA1_mid1_sm28	cctgtcaccaaatttggtaa
SPA1_mid1_sm29	agctgtttgtttaggaatca
SPA1_mid1_sm30	cctctgataacagaacaagt
SPA1_mid1_sm31	gtttctagtctgtgtcagaa
SPA1_mid1_sm32	tttcaacacctttttaagcc
SPA1_3'_sm1	tctgtctcttatgccaaacg
SPA1_3'_sm2	taactcctttgagtttccac
SPA1_3'_sm3	tagggcatgctctcttctag
SPA1_3'_sm4	gcacagtataacaaggccag
SPA1_3'_sm5	taagttttctcagacccaga
SPA1_3'_sm6	atggcagagtcatcatatct
SPA1_3'_sm7	ctagtttaacacaggctgga
SPA1_3'_sm8	caatgctctggtttcccaaa
SPA1_3'_sm9	attttttcaggttccagttt
SPA1_3'_sm10	atgtggctgagttgatgtga
SPA1_3'_sm11	ctcacagatggaatttggca
SPA1_3'_sm12	cacgtggtagtcatttgtat
SPA1_3'_sm13	ttgcactgtttaggtgatgt
SPA1_3'_sm14	ccaattacttctactatgct
SPA1_3'_sm15	actattacagcaaggggttt
SPA1_3'_sm16	tttggaactccttggaactt
SPA1_3'_sm17	tgggaaaagaaggcaggcaa
SPA1_3'_sm18	gctcagagacaatactgcta
SPA1_3'_sm19	gaggatggataccaccatgg
SPA1_3'_sm20	taggctaaattcattgtcca
SPA1_3'_sm21	atcttactctgatgtggtga
SPA1_3'_sm22	agaatagctctggcatgtag
SPA1_3'_sm23	gttgatgctatcatgttttt
SPA1_3'_sm24	atggcattcatttgctatgt
SPA1_3'_sm25	ctgcaatgcagatagcatca
SPA1_3'_sm26	ctgcaaaagagaaattgccc
SPA1_3'_sm27	atttggcatatgttttgagt
SPA1_3'_sm28	catgcatcacggtattcaga
SPA1_3'_sm29	gttgaacacagttggtactc
SPA1_3'_sm30	tgaccgtatcataacacgca
SPA1_3'_sm31	tgtgagtattcttcctataa
SPA2-5'_sm1	ATCCTCAGACAATTATTCTCAT
SPA2-5'_sm2	CTCAGATTGACATCTGGAATGA
SPA2-5'_sm3	TGAGAGTCTTATTTGTCCTATT
SPA2-5'_sm4	GAGGTACTATGTTGTCACTGAG
SPA2-5'_sm5	CTTCGGAGAGATAGAAAAGGCA
SPA2-5'_sm6	CATAAGACAGGATGCTAATGCC
SPA2-5'_sm7	ACCATACTAAAGTGCATACTGA
SPA2-5'_sm8	AATAAAGTGAGTCTTGGGTCAC
SPA2-5'_sm9	TCTACAATTCTCTGCTCAAAAT
SPA2-5'_sm10	ACATATTTCCCATATATGTATC
SPA2-5'_sm11	TCATTTTTTCATTTGTTAATCA
SPA2-5'_sm12	TGACCTTTCTTGACTGAAACTT
SPA2-5'_sm13	CCTTCACTATACATCACAGTTC
SPA2-5'_sm14	TATTTAATACAGGCATGCAGTG
SPA2-5'_sm15	CACTAAAATTGGTTCCTTTGTC
SPA2-5'_sm16	TGGTCTCAGAAAATACTCAACA
SPA2-5'_sm17	CCTCTACCTCAGCAAAACAAAA
SPA2-5'_sm18	TATTTTCTGAAGTGGAGGACCT
SPA2-5'_sm19	AGGATGTTGGTTTAACTACTCA
SPA2-5'_sm20	GGAACGCATGACGTATATGAAT
SPA2-5'_sm21	CAAAAAGATCTCAGGATGTGGC
SPA2-5'_sm22	TTTAGATATTATCCAGTAAGCC
SPA2-5'_sm23	GAAATGAAGGTGGAGAGACTCA
SPA2-5'_sm24	CTACATTTGTCATTTCATGCAA
SPA2-5'_sm25	GAAAATCAGACTAACACCCTTA
SPA2-5'_sm26	CCCAATTTTCATAAAATCTGGG
SPA2-5'_sm27	ACATAACTATATCTACACTACT
SPA2-5'_sm28	ACAGTAAGACTCTGTCTCTTAA
SPA2-5'_sm29	TTTTTTGTTTGTTTAGTGACAG
SPA2-5'_sm30	CAGTAAGATCCTATCTTCACAA
SPA2_mid_sm_1	gttccgatgagaatgacgtt
SPA2_mid_sm_2	cagaggaagcaacatgctgg
SPA2_mid_sm_3	tggtggaacctatgggaatc
SPA2_mid_sm_4	cgagacttttgtctgtggat
SPA2_mid_sm_5	acacagagggaatgttccta
SPA2_mid_sm_6	ctaggcctgcaacatttctg
SPA2_mid_sm_7	tgctggcaacatttccactt
SPA2_mid_sm_8	ttctgggagcttaccagtag
SPA2_mid_sm_9	actgagatgaccactgtgag
SPA2_mid_sm_10	gctctcctcgacatgaaaac
SPA2_mid_sm_11	ctcccctgttctcaactaat
SPA2_mid_sm_12	aagaggctttcactgtttgc
SPA2_mid_sm_13	tgaccaatgctgcagggtag
SPA2_mid_sm_14	atgacactcatgtccatgtg
SPA2_mid_sm_15	gtcttccaccagaaaaatcc
SPA2_mid_sm_16	tgggaagactggaagtgacc
SPA2_mid_sm_17	gatttgcacaatggaggagc
SPA2_mid_sm_18	ggccaagagaccatttatag
SPA2_mid_sm_19	atttgctcatacaagctgca
SPA2_mid_sm_20	ttcaggactgaagctgcttt
SPA2_mid_sm_21	atagctccaagtgtgacgag
SPA2_mid_sm_22	ggcatcccaagtaaaaggac
SPA2_mid_sm_23	atattgccaacatgcagagg
SPA2_mid_sm_24	tgtagtggactccaacactt
SPA2_mid_sm_25	aaaacagttcatcaccccta
SPA2_mid_sm_26	acttcaaaccggttaaggga
SPA2_mid_sm_27	ttcaacatggcatggctgtc
SPA2_mid_sm_28	caacattcctaagccatctg
SPA2_mid_sm_29	tacatgcatgcagctagtga
SPA2_mid_sm_30	cgcaatgcctcaaagtcaac
SPA2_mid_sm_31	tactgacctctgaggcaaca
SPA2_mid_sm_32	gaatggctgcttttccaatg
SPA2_mid_sm_33	atgccctctcgacacacaaa
SPA2_mid_sm_34	ccaaaggacctcaagacaca
SPA2_mid_sm_35	cacatcagcctgaaacttgg
SPA2_3'_sm_1	atcagggaccttctctcttg
SPA2_3'_sm_2	catttcaatgtcagcacact
SPA2_3'_sm_3	aaccataaccatctagtcca
SPA2_3'_sm_4	aatctaccccttacttacac
SPA2_3'_sm_5	cattcactcccagaagagtt
SPA2_3'_sm_6	ttgttttgggaatttgctga
SPA2_3'_sm_7	gaggctttttgtctaagggg
SPA2_3'_sm_8	gtctaggcaatgcataggtg
SPA2_3'_sm_9	aacatcttacctttagtggg
SPA2_3'_sm_10	cccagaaagcaaggactatt
SPA2_3'_sm_11	tttctactaagacatggctt
SPA2_3'_sm_12	gctgcatctcttaacatatt
SPA2_3'_sm_13	tgtagaaaagccacgaaggt
SPA2_3'_sm_14	ccatgaaggagttcagttta
SPA2_3'_sm_15	tctagcatcacaatggatca
SPA2_3'_sm_16	tactgtgtcttctgtgtaca
SPA2_3'_sm_17	ccatctggtttcttaaagct
SPA2_3'_sm_18	aaaacttcctcatgtccagg
SPA2_3'_sm_19	tccatgatgaggccaaaaca
SPA2_3'_sm_20	aatctcatttctagcacctg
SPA2_3'_sm_21	tatacccagagtacacagag
SPA2_3'_sm_22	aattcctctttaatcttccc
SPA2_3'_sm_23	ctaaggagtcatgggggtat
SPA2_3'_sm_24	acacagtggggaaaagtggc
SPA2_3'_sm_25	actcaacaaatccacctctt
SPA2_3'_sm_26	atgcggaaggaagactgtgt
SPA2_3'_sm_27	ccactgcaacacaggaaaga
SPA2_3'_sm_28	catttcttatctgcaggagg
SPA2_3'_sm_29	acatgagcatttctcagtta
SPA2_3'_sm_30	aagtctcatcgatgatatcc
SPA2_3'_sm_31	ttgagtcaagtggcagcaag
SPA2_3'_sm_32	tatatcctctactgaggctc
SPA2_3'_sm_33	ttttgagcatcttgtgtaat
SPA2_3'_sm_34	ggagcactgagcaattccac
SPA2_3'_sm_35	agaatgcatgtagttcactt
SPA2_3'_sm_36	tgagctcttcgaaatcagga
SPA2_3'_sm_37	atccaaatcttatttcccga
C. smFISH probes in detecting sno-lncRNAs
sno-lncRNA1_sm1	aagttgtccctcactagtaa
sno-lncRNA1_sm2	ggtgttagaacctataggga
sno-lncRNA1_sm3	tgctctccttgaaagcagaa
sno-lncRNA1_sm4	aggagggacagaaaggcttt
sno-lncRNA1_sm5	acaccacaggaatctcacag
sno-lncRNA1_sm6	ctctacaaccttttctctgg
sno-lncRNA1_sm7	catcaccaccaaatgacagc
sno-lncRNA1_sm8	ctgtcatccaccagagaaat
sno-lncRNA1_sm9	gagaccatttccaggaagat
sno-lncRNA1_sm10	agagcagtatttgctcacac
sno-lncRNA1_sm11	tggaagctgctttcaaagcg
sno-lncRNA1_sm12	aatacgccaagtgtgactgg
sno-lncRNA1_sm13	ctggtattgcacatgtgttg
sno-lncRNA1_sm14	aggcatcccaaatcaagaga
sno-lncRNA1_sm15	ggaacatcgccaacacacaa
sno-lncRNA1_sm16	ctgaggatgtagcagaatcc
sno-lncRNA1_sm17	gtgagctgaaacgcttcatt
sno-lncRNA1_sm18	cactatgatgtcaaaccggc
sno-lncRNA1_sm19	gtcctaagtcaactatgtgc
sno-lncRNA1_sm20	gagacatagaaccaccaacc
sno-lncRNA1_sm21	atcaccaggtttacatgcaa
sno-lncRNA1_sm22	aacgtcagcaagtcaacacc
sno-lncRNA1_sm23	acttaactgcactaccaacc
sno-lncRNA1_sm24	acaaggtggacaggacacac
sno-lncRNA1_sm25	atggctagttttccaacagg
sno-lncRNA1_sm26	atgccttcaggacacacaaa
sno-lncRNA1_sm27	ccaaaggacctcaagacaca
sno-lncRNA1_sm28	cagagacagtcttctgaacc
sno-lncRNA1_sm29	ccacgttggtcttaaacacg
sno-lncRNA1_sm30	aaacttgcactggaaggcac
sno-lncRNA1_sm31	acacctgacaccaaaccaac
sno-lncRNA1_sm32	aatgtcgtgaccagacactg
sno-lncRNA1_sm33	aattttgacctaggggtcag
sno-lncRNA1_sm34	aaggccttcaatcagtagga
sno-lncRNA1_sm35	tgcaaccaaaaggctcgaga
sno-lncRNA2_sm1	agaatgcttcatgcaacggg
sno-lncRNA2_sm2	caaacggaatcccttcctaa
sno-lncRNA2_sm3	cttgtagacagaagtcctgt
sno-lncRNA2_sm4	acggactgcatgtgtgctac
sno-lncRNA2_sm5	gaggcaggctacaggttaac
sno-lncRNA2_sm6	caaggacaatcttggccacc
sno-lncRNA2_sm7	aagcacaattacttgtcttc
sno-lncRNA2_sm8	tatggccttgttctctcttc
sno-lncRNA2_sm9	tatgccaggtgattggaact
sno-lncRNA2_sm10	atgcatggaacacaacatga
sno-lncRNA2_sm11	ctgccatatgcatgtactca
sno-lncRNA2_sm12	ttgcagtgggaacctgtgtg
sno-lncRNA2_sm13	tggggttaagctagagactc
sno-lncRNA2_sm14	gaagccattgacgtacactg
sno-lncRNA2_sm15	acagggccatgcaattttaa
sno-lncRNA2_sm16	acctataatgtcactcacaa
sno-lncRNA2_sm17	ctctcaacacccttacatcg
sno-lncRNA2_sm18	agagcactgacattgagcat
sno-lncRNA2_sm19	ttgtagtagtgcatcagcac
sno-lncRNA2_sm20	gaaatgcatggacaagggct
sno-lncRNA2_sm21	tctggctttacctgattttg
sno-lncRNA2_sm22	cagtgtatctggttgatacc
sno-lncRNA2_sm23	aaaggccatgtcctctgatc
sno-lncRNA2_sm24	atctgacagatgtgcagtac
sno-lncRNA2_sm25	aaacacgggtgtgcttgaga
sno-lncRNA2_sm26	ttccacgtgggaggtgaaga
sno-lncRNA2_sm27	aacatggtcctggccaattc
sno-lncRNA2_sm28	gagatgatgattgtccctca
sno-lncRNA2_sm29	ctggcttctctgaggttaac
sno-lncRNA2_sm30	aaggaagcctacaccatgtg
sno-lncRNA2_sm31	ttcaggagagatccaacagc
sno-lncRNA2_sm32	gcactgggaaggaattgctt
sno-lncRNA3_sm1	gcaatgggcatcatcaaatgaa
sno-lncRNA3_sm2	aaggaatctcctgtgtacatag
sno-lncRNA3_sm3	cctcacaaatagagtccttcaa
sno-lncRNA3_sm4	aaggacaaactgccatgcagag
sno-lncRNA3_sm5	aaggaacatggaaatccagagc
sno-lncRNA3_sm6	ttctcaagcaaaatcacctatc
sno-lncRNA3_sm7	acaaaagtatggtactgtgctg
sno-lncRNA3_sm8	tcctcaatggacgatgaaatga
sno-lncRNA3_sm9	acaatgcatgggacacaacatg
sno-lncRNA3_sm10	aggataagccagagtctcattg
sno-lncRNA3_sm11	tactgggaagactttgatctac
sno-lncRNA3_sm12	aagagcactaatgttgagcatc
sno-lncRNA3_sm13	gaaatgcacgtacatagggatg
sno-lncRNA3_sm14	tggcttcaactatttatggaca
sno-lncRNA3_sm15	ctgcgatacatctggaatctgg
sno-lncRNA3_sm16	agaaaggcagacaggtacacag
sno-lncRNA3_sm17	ggaggtgtagaggaaacacaag
sno-lncRNA3_sm18	cacacaagataacaattgtccc
sno-lncRNA3_sm19	aaagaagcctttgccatttgtg
sno-lncRNA3_sm20	catgcagaagggatccaacaac
sno-lncRNA3_sm21	agagcgctctgggaaagaactg
sno-lncRNA3_sm22	ttgtccctgcaaatgaggaaaa
sno-lncRNA3_sm23	AGCCCCTGTAAGAGCAATGTGC
sno-lncRNA3_sm24	AATGAAATTTGTCCCTCTCTCT
sno-lncRNA3_sm25	CCATTCTCCTTTGCCCAAACGA
sno-lncRNA3_sm26	TTCACCTACTCCTGCGGACAGC
sno-lncRNA3_sm27	AGACTCAGCTTGGAGTGGCAGC
sno-lncRNA3_sm28	CAATGCAGCTCACAATAGCCTC
sno-lncRNA3_sm29	TCAACACCCTTGCTTCCACACC
sno-lncRNA3_sm30	CTTATAGTGCATCATCTCGCTA
sno-lncRNA4_sm1	tagcccctgttggagtaatg
sno-lncRNA4_sm2	tcaacaaacggatgttggcc
sno-lncRNA4_sm3	acagacgccttgatataacc
sno-lncRNA4_sm4	acccataagagaccacattc
sno-lncRNA4_sm5	aatttcctatacatgggagc
sno-lncRNA4_sm6	ctcactgacagtccttcaaa
sno-lncRNA4_sm7	agacaatgcatgtgttaccc
sno-lncRNA4_sm8	acatggacattcacctagtc
sno-lncRNA4_sm9	taccagctaactcttgctag
sno-lncRNA4_sm10	acaaattggcaaccagaggc
sno-lncRNA4_sm11	gaacccagaacaaggactca
sno-lncRNA4_sm12	ctcaaccacacagatctgtt
sno-lncRNA4_sm13	atgacaaagatgcggccttg
sno-lncRNA4_sm14	accaaggacaaagttagcca
sno-lncRNA4_sm15	tatgcctggtgaccaaaact
sno-lncRNA4_sm16	tacaacacgggcacaaaggc
sno-lncRNA4_sm17	catgtcctcaaaacacgtgg
sno-lncRNA4_sm18	gctcacctttacgtgcaaaa
sno-lncRNA4_sm19	tttaggataagccagggact
sno-lncRNA4_sm20	ggaggaaggctttaacctac
sno-lncRNA4_sm21	gcaatgccactcacaaaagc
sno-lncRNA4_sm22	agtacaccatcctgctaaag
sno-lncRNA4_sm23	catggatgcagggatgctcg
sno-lncRNA4_sm24	cctgttcatggaggcagaaa
sno-lncRNA4_sm25	tttatctactatctgcctgt
sno-lncRNA4_sm26	aagacagacaggtgcacagg
sno-lncRNA4_sm27	cagagttaacacaggcgtgc
sno-lncRNA4_sm28	taacaattgtccctcaccaa
sno-lncRNA4_sm29	tatctccgcagctcacacaa
sno-lncRNA4_sm30	aacttccgaaggagcctttg
sno-lncRNA4_sm31	ttacattcagaagggatcca
sno-lncRNA4_sm32	gagtgctctgggaaagaagt
sno-lncRNA5_sm1	taaactccctcctcatgttt
sno-lncRNA5_sm2	tatgggtaggttagttttcc
sno-lncRNA5_sm3	gagaacaattcatttgctct
sno-lncRNA5_sm4	ttgctatgtcaaaccacagc
sno-lncRNA5_sm5	tgctgccaagcaaatacaaa
sno-lncRNA5_sm6	gtctaccagctgtttctata
sno-lncRNA5_sm7	gtcccatgaatctcactatg
sno-lncRNA5_sm8	ggctcaagagtaggtgaaat
sno-lncRNA5_sm9	ctgcgagctcaaatgtgtga
sno-lncRNA5_sm10	actgctcattgaccagataa
sno-lncRNA5_sm11	accatctcattaccctcaag
sno-lncRNA5_sm12	gtatctttggatttggatgt
sno-lncRNA5_sm13	cacaatcctagtggctgaat
sno-lncRNA5_sm14	gtggtttgctttttgatacg
sno-lncRNA5_sm15	cacaatggaaacctttgagg
sno-lncRNA5_sm16	acaattaggatacctcttca
sno-lncRNA5_sm17	catccccaatcaaaagcatt
sno-lncRNA5_sm18	acattagtctcaaagcttcc
sno-lncRNA5_sm19	cacagtagacactcactgga
sno-lncRNA5_sm20	gccaaatggaatgtttagtt
sno-lncRNA5_sm21	ttgtatctcacccaatctac
sno-lncRNA5_sm22	ccactggttcagtggtaaaa
sno-lncRNA5_sm23	ctcccaagttagttaactgg
sno-lncRNA5_sm24	gatactacctcaggagtgtg
sno-lncRNA5_sm25	cctattgttcaccaaaccaa
sno-lncRNA5_sm26	ttcctaacattgtctgtatt
sno-lncRNA5_sm27	ggtttcattattaatcagca
sno-lncRNA5_sm28	tagtctgcatcatcttgtga
sno-lncRNA5_sm29	cccattactttccatcatat
sno-lncRNA5_sm30	cctaaggacaggaagcagaa
sno-lncRNA5_sm31	catgggaaaattcctactgg
sno-lncRNA5_sm32	tctcttaacaggatgtcagt
sno-lncRNA5_sm33	catggtcattggagtgtcat
sno-lncRNA5_sm34	tggctgactagcatagccag
sno-lncRNA5_sm35	agaccagcatcactgtcaat
sno-lncRNA5_sm36	gctgacccacactatttaat
sno-lncRNA5_sm37	gacactgatcacacagcttt
sno-lncRNA5_sm38	cctgagtctgagatatgtga
