# Supplementary material
Source: HighWire-hosted journal article supplement (doi:10.1101/rna.080341.124)
Supplement: Supplemental_Table_S2.xlsx [file Supplemental_Table_S2.xlsx]

## Sheet: Sheet1
Table S2. List of primers used in this study
A. Primers used in protein expression and purification constructions
FUBP1_bamhI_F	acagcaaatgggtcgcggatccGCAGACTATTCAACAGTGCC
X_TER_FUBP1_R	ggtggtggtggtggtgctcgagTTATTGGCCCTGAGGTGCTGGA
HNRNPA2B1_F	ATTCTGCAGTCGACGGTACCatggagaaaactttagaaactg
HNRNPA2B1_R	TTATCTAGATCCGGTGGATCCtcagtatcggctcctcccac
HNRNPD_F	ATTCTGCAGTCGACGGTACCatgtcggaggagcagttc
HNRNPD_R	TTATCTAGATCCGGTGGATCCttagtatggtttgtagctattttg
HNRNPC_F	ATTCTGCAGTCGACGGTACCatggccagcaacgttacca
HNRNPC_R	TTATCTAGATCCGGTGGATCCttaagagtcatcctcgccat
PUM2_F	ATTCTGCAGTCGACGGTACCatgaatcatgattttcaagcTC
PUM2_R	TTATCTAGATCCGGTGGATCCttacagcattccatttggtggtc
PTBP1_F	ATTCTGCAGTCGACGGTACCatggacggcattgtcccaga
PTBP1_R	TTATCTAGATCCGGTGGATCCctagatggtggacttggaga
RBMX_F	ATTCTGCAGTCGACGGTACCatggttgaagcagatcgcc
RBMX_R	TTATCTAGATCCGGTGGATCCctagtatctgcttctgcctcc
FUBP1_F	TTCGAATTCTGCAGTCGACGGTACCGCAGACTATTCAACAGTGCCTCCC
FUBP1_R	ggcgTTATCTAGATCCGGTGGATCCTTGGCCCTGAGGTGCTGGAGGATG
FUBP3_F	TTCGAATTCTGCAGTCGACGGTACCATGGCGGAGCTGGTGCAGGGGCAG
FUBP3_R	ggcgTTATCTAGATCCGGTGGATCCCTGCTCCTGGCTGTGGGCCTGCGC
HNRNPR_F	TTCGAATTCTGCAGTCGACGGTACCGCTAATCAGGTGAATGGTAATGCG
HNRNPR_R	ggcgTTATCTAGATCCGGTGGATCCCTTCCACTGTTGCCCATAAGTATC
KHSRP_F	TTCGAATTCTGCAGTCGACGGTACCTCGGACTACAGCACGGGAGG
KHSRP_R	ggcgTTATCTAGATCCGGTGGATCCTTGAGCCTGCTGCTGTCCCTGCTG
hnRNP M_F	TTCGAATTCTGCAGTCGACGGTACCATGGCGGCAGGGGTCGAAGCGGC
hnRNP M_R	ggcgTTATCTAGATCCGGTGGATCCTTAAGCGTTTCTATCAATTC
HNRNPA1_F	TTCGAATTCTGCAGTCGACGGTACCTCTAAGTCAGAGTCTCCTAAAGAG
HNRNPA1_R	ggcgTTATCTAGATCCGGTGGATCCAAATCTTCTGCCACTGCCATAGCT
MYEF2_F	TTCGAATTCTGCAGTCGACGGTACCGCGGACGCCAACAAGGCCGAGGTG
MYEF2_R	ggcgTTATCTAGATCCGGTGGATCCTGCATTACGATCCAAGCGAACATC
HNRNPL_F	TTCGAATTCTGCAGTCGACGGTACCATGCCTAAAAAGAGACAAGCACTG
HNRNPL_R	ggcgTTATCTAGATCCGGTGGATCCGGAGGCGTGCTGAGCAGTGGAGAA
ELAVL1_F	TTCGAATTCTGCAGTCGACGGTACCTCTAATGGTTATGAAGACCACATG
ELAVL1_R	ggcgTTATCTAGATCCGGTGGATCCTTTGTGGGACTTGTTGGTTTTGAA
5K-EcorI_F	ctcgacggtatcgccgaattc
cPPT/CTS_R	cctgtaataaacccgaaaattttga
SNRPN_5K_F	aattttcgggtttattacaggAGCCACCACCAGTTTTTTAGC
SNRPN_5K_R	tgtttttggcgtcttccatGGATTCCGGATCTGGTTCTCCA
TtoC_mut_R	CTgCggggTggggggTggggggGCCgggTGTGGTGTTGCACACCTCTGG
TtoC_mut_F	AcccGGCccccccAccccccAccccGcAGAGACGAGTCTTGCTATGTTGCC
CA_F	CCCACACACACACAAGAGACGAGTCTTGCTA
CA_R	CTTGTGTGTGTGTGGGTGTGTGTGTGTGTGTGGTGTTGCACACCTC
SNRPN_NdeI_R	GTTAACCCTGAAGTTACCATATGAC
SPA1_E4_F	TGATGACTGAAAAAGGGAAAC
SPA1_E6_R	CCAGCACTTTTGAAGAATGAC
SD_F	CTGCACGTGCTCTAGAGTC
SA_R	ATCTCAGTGGTATTTGTGAGC
XhoI_I3_F	CACCAGAATTCTGGAGCTCGAGTAAGGGCAGTTGAGTGCTAAC
NheI_I5_R	ATTGTTCTCTTAATTTGCTAGCCTCAAAATGGTTTCAAAGAGCC
BS1_CAmut_F	acacacacacacacacacacacacacacacacacacacatGCCTTCTATTTCAGCAGTTA
BS1_CAmut_R	gtgtgtgtgtgtgtgtgtgtgtgtgtgtgtgtgtgtCCAAAGTCATAAAACAGAACAAGA
BS2_CAmut_F	acacacacacacacacacacacacacacacacacaCTGTCTTATCTATTCCATTGAGTTC
BS2_CAmut_R	tgtgtgtgtgtgtgtgtgtgtgtgtgtgtgtgtgtgtgtGTAGCCAATTTTACCTGGAAA
B. Primers used in RT-qPCR analysis
SPA1-new_qF1	AATGCAGCGACTACCATGAA
SPA1-new_qR1	GGATGTTCCTGATGATTCCATTTG
SPA1-new_qF2	TGAGTCTTCTGTCCAACTGC
SPA1-new_qR2	GCACAATGATTTGGATTGATATGC
SPA2-new_qF1	ACATTCTCCTGTTCTGTGGAATAA
SPA2-new_qR1	CCTCAGATCTTCATTGGCGTAA
SPA2-new_qF2	CTCACCTCCACACCAAAGAA
SPA2-new_qR2	AAAGGAGGCAGTTGGATAAGG
pre-SPA1-1_QF	AACACCCTTTACCTGGTATGTT
pre-SPA1-1_QR	TCCATGGATTATAACTGACTACCTG
pre-SPA2-1_QF	GTCGTGGAAGCCAAGGAATA
pre-SPA2-1_QR	GTCCACTGGTCAACACTTCA
SNRPN-QF	GGATTTGGTGGAACAGCAAT
SNRPN-QR	AAGGTGCCAATGAAGATTCG
pre_SNRPN-QF3	ACAGCCTGAGAGCCTAAGAA
pre_SNRPN-QR3	GGGCCAGACAACAATGATAGAG
actin-QF	CACCATTGGCAATGAGCGGTTC
actin-QR	AGGTCTTTGCGGATGTCCACGT
GAPDH_QF	GTCTCCTCTGACTTCAACAGCG
GAPDH_QR	ACCACCCTGTTGCTGTAGCCAA
snolncRNA1-QF1	CTTGGCGTATTCATGGAGGT
snolncRNA1-QR1	ACCGGCTAAGTGAGCTGAAA
snolncRNA2-QF1	TGTCCTTGACTCCTGGCTCT
snolncRNA2-QR1	ATGCCAGGTGATTGGAACTC
snolncRNA3-QF1	CGTGCATCCCTATGTACGTG
snolncRNA3-QR1	CAATGCTACCTGGGAGGTGT
snolncRNA4-QF1	TTTGTGCCCGTGTTGTATCC
snolncRNA4-QR1	GCAATGCCACTCACAAAAGC
snolncRNA5-QF1	GGAACCAGGGCATAGTGAGA
snolncRNA5-QR1	TTGGATTTGGATGTTGACCA
SPA1-QF	GTCAGTGTGCCTCACTAGAC
SPA1-QR	CAAAGTGCAATACTACACCTG
SPA2-QF	AGACTCTCAGAGCCTGGCTC
SPA2-QR	CATAAGACAGGATGCTAATG
C. Primers used in RNA IVT template constructions
SPA1-IVT1-F1	GAAATTAATACGACTCACTATAGGGAGAGAAGGGGGTTGCAGACATGG
SPA1-IVT1-R1	CAAGCTATTTAGGTGACACTATAGAAGAGCCTGCAGATAGTGTATCTCT
SPA1-IVT1-F2	GAAATTAATACGACTCACTATAGGGAGATCAACGTGATTACTCTGAAG
SPA1-IVT1-R2	CAAGCTATTTAGGTGACACTATAGAAGAGTCAATGTTCATGGTATATTT
SPA1-IVT1-F3	GAAATTAATACGACTCACTATAGGGAGAGGGAATTAGTGCCAGATATG
SPA1-IVT1-R3	CAAGCTATTTAGGTGACACTATAGAAGAGCATTTGAACACATTGGCTAC
SPA1-IVT2-F1	GAAATTAATACGACTCACTATAGGGAGAATAACATTTTAAGAGCAGGT
SPA1-IVT2-R1	CAAGCTATTTAGGTGACACTATAGAAGAGAAAAAAGAATGGAGGAAAAA
SPA1-IVT2-F2	GAAATTAATACGACTCACTATAGGGAGAGTCTGTTTCATCAAGTAGAG
SPA1-IVT2-R2	CAAGCTATTTAGGTGACACTATAGAAGAGTACAGTTTTCTCCATGCTGG
SPA1-IVT2-F3	GAAATTAATACGACTCACTATAGGGAGATCTCAGGTCACCTTTTAAAG
SPA1-IVT2-R3	CAAGCTATTTAGGTGACACTATAGAAGAGATGATCCAGTGAACAGTTTG
SPA1-IVT3-F1	GAAATTAATACGACTCACTATAGGGAGAAAACAATCTTTTGCTAATAG
SPA1-IVT3-R1	CAAGCTATTTAGGTGACACTATAGAAGAGACAGAGCTCTTAAAATCATT
SPA1-IVT3-F2	GAAATTAATACGACTCACTATAGGGAGAAGTATTTCTAGATGTATAGA
SPA1-IVT3-R2	CAAGCTATTTAGGTGACACTATAGAAGAGAAAACCCCACAATGGTTATT
SPA1-IVT3-F3	GAAATTAATACGACTCACTATAGGGAGAACTTTTAAAAACTATCAGAT
SPA1-IVT3-R3	CAAGCTATTTAGGTGACACTATAGAAGAGGGTAGTCGCTGCATTAATGT
SPA1-IVT4-F1	GAAATTAATACGACTCACTATAGGGAGATGAAAAAGGGAAACTGTGCC
SPA1-IVT4-R1	CAAGCTATTTAGGTGACACTATAGAAGAGATGCAAATTTCAGTCAGTGA
SPA1-IVT4-F2	GAAATTAATACGACTCACTATAGGGAGACTTCTTGCATCTTTGCTTCT
SPA1-IVT4-R2	CAAGCTATTTAGGTGACACTATAGAAGAGGGAACACAAGTTCTACCTAA
SPA1-IVT4-F3	GAAATTAATACGACTCACTATAGGGAGATTTTTGCAATGCTCATTTAT
SPA1-IVT4-R3	CAAGCTATTTAGGTGACACTATAGAAGAGACCTGCTTTCCCAAAACAGA
SPA1-IVT5-F1	GAAATTAATACGACTCACTATAGGGAGAAGATGCATTATTTAGTATCT
SPA1-IVT5-R1	CAAGCTATTTAGGTGACACTATAGAAGAGCTTGGTGCTTCATTTGTTTA
SPA1-IVT5-F2	GAAATTAATACGACTCACTATAGGGAGAATAATTGTTACCTAAAGAAT
SPA1-IVT5-R2	CAAGCTATTTAGGTGACACTATAGAAGAGTTGGAATGCTAATTATGAGT
SPA1-IVT6-F1	GAAATTAATACGACTCACTATAGGGAGATACATGAAGAGTGAGATTAA
SPA1-IVT6-R1	CAAGCTATTTAGGTGACACTATAGAAGAGTGTACAATGACTGTACAATT
SPA1-IVT6-F2	GAAATTAATACGACTCACTATAGGGAGATTGTCATTCCCTAACTAATG
SPA1-IVT6-R2	CAAGCTATTTAGGTGACACTATAGAAGAGAGGTTTTCACCTCCTCAGAA
SPA1-IVT6-F3	GAAATTAATACGACTCACTATAGGGAGAGAAGGAAGTGTTTGTGAACC
SPA1-IVT6-R3	CAAGCTATTTAGGTGACACTATAGAAGAGGCATTCCCAATAAACCTGAA
SPA1-IVT7-F1	GAAATTAATACGACTCACTATAGGGAGATTTAAGCATCACAATTTTTA
SPA1-IVT7-R1	CAAGCTATTTAGGTGACACTATAGAAGAGATCATGCTGCTTTCCTGCAT
SPA1-IVT7-F2	GAAATTAATACGACTCACTATAGGGAGAAATGGACAGTGGTGATGGTG
SPA1-IVT7-R2	CAAGCTATTTAGGTGACACTATAGAAGAGAACTTGGCAGTTTATTCATT
EGFP-F	ATGGTGAGCAAGGGCGAG
T7-EGFP-R	AATTAATACGACTCACTATAGGGCcaCTTGTACAGCTCGTCC
SPA1_107_F	GGTTCATGATGACACAGGACC
SPA1_T7_R	GAAATTAATACGACTCACTATAGGGGGTGAAAGGATCGTTTGAGC
SPA2_IVT_F1	GAAATTAATACGACTCACTATAGGGGGATCGATGATGAGAATAATTGTC
SPA2_IVT_R1	ATTTAGGTGACACTATAGATGTACTCCAGCCTGGGTGAC
SL1_F1	CTTGGTCTTGATCTTTGGTTAGC
SL1_T7_R1	ATTAATACGACTCACTATAGGGCCACAGGGAAACTTGCAC
SL2_F	GGCTATAGAGGGACAACTGTC
SL2_T7_R	gaaattaatacgactcactatagggGCACTGGGAAGGAATTGCTTAC
SL3_F	GCACATTGCTCTTACAGGGGC
SL3_T7_R	gaaattaatacgactcactataggggTCTGGGAAAGAACTGCTTACATG
SL4_F	CCGTTTGTTGACATGGGTTATATC
SL4_T7_R	gaaattaatacgactcactataggggATCCAACAACTTCCGAAGGAGC
SL5_F	TGGGACCATGCCAGGCAAAC
SL5_T7_R	GAAATTAATACGACTCACTATAGGGGGCACATTTTAAAAAGGAACCC
T7_I4_bs1-F	taatacgactcactatagggCTTTGGAGTTTTGTGGTTTTTTAAAACATGTTTACATTGGTATCATTTATTTGTATTGCC
T7_I4-bs1-R	GGCAATACAAATAAATGATACCAATGTAAACATGTTTTAAAAAACCACAAAACTCCAAAGccctatagtgagtcgtatta
T7_I4_bs2-F	taatacgactcactatagggCATTTCTGTTAACTTGCCTTACCATTTTATTGACACTTTAATAATTACTAATGATTTATA
T7_I4-bs2-R	TATAAATCATTAGTAATTATTAAAGTGTCAATAAAATGGTAAGGCAAGTTAACAGAAATGccctatagtgagtcgtatta
T7_NC_F	taatacgactcactatagggACACACACACCACACACACCACACACACACACACACACACACACACACACACACACACAC
T7_NC_R	GTGTGTGTGTGTGTGTGTGTGTGTGTGTGTGTGTGTGTGTGGTGTGTGTGGTGTGTGTGTccctatagtgagtcgtatta
D. Primers used in shRNA constructions
scramble	GATGACATTACGGCATGTTCACTC
MYEF2-sh1	CCTCCTGAAGTCATCAGTAAT
MYEF2-sh2	CCCTAGAAACTATGAACAAAT
FUBP1-sh1	TACAACCCTGCACCTTATAAT
FUBP1-sh2	ACTACTGATAGGAGGTTAATA
hnRNP M-sh1	CGAATTGATAGAAACGCTTAA
hnRNP M-sh2	ACAAGCATAGTCTGAGCGGAA
E. Primers used in sgRNA constructions
FUBP1-sg1_F	caccgAAGATGCACTGCAGAGAGCC
FUBP1-sg1_R	aaacGGCTCTCTGCAGTGCATCTTc
F. Primers used in FUBP1 ChIP-qPCR assay
p1_qF	TCTGTCTAGCTGCTTTCACTC
p1_qR	GAAACAACTATGGCATGGTACA
p2_qF	AGTTTGGGTAGCTGGGACTA
p2_qR	GGAGTCCAAGATCTCCCTGATA
p3_qF	CCTGAGTTCAAGCAATCCTCTC
p3_qR	GGAAACAACTCAAATGCTCATCAA
p4_qF	AGGTGTGCAACACCACAT
p4_qR	AGGCAGATCGCTTGAATCC
p5_qF	AGTGCAGTGGTGCAATCT
p5_qR	GCTGCTTGGGACTGAGAC
p6_qF	GCCTCCCAAAGTGCTGATA
p6_qR	CTACTCCTAAGCAGATCACAAAGA
p7_qF	TTGTAGGTCATATGGTAACTTCAGG
p7_qR	GAACCCTCTAACACTGCTGATT
p8_qF	TGCTTATTGGCCATTGGTATTT
p8_qR	CACGCCACTGCACTCTA
p9_qF	TACATTCTGGATACTACACTCCTAGT
p9_qR	CGATTCAAGGGACATTAAGAAAGTG
p10_qF	CCTTAAGTGTTTGGCTTGGG
p10_qR	GAAGGAGACATTGCCACTAAAC
p11_qF	GACTCCAAAGCGAATTTCCTAATG
p11_qR	TGGACCTATCTTCCATTGTTTCT
p12_qF	GTTTGGTGTCCACAATGGAA
p12_qR	GGCTCTTAGAACTTCACCAAATG
p13_qF	GGAATTTAATGCACAGAGGGTTAG
p13_qR	AACCATGCCTTTGGACTCA
p14_qF	ATCTCCTGACCTCGTGATCT
p14_qR	AACATGGGAAGTTGACTCTGAT
p15_qF	CCATCAGCCATATTGCATGTTATT
p15_qR	AGGCTTATCAATGCTGACTTCT
p16_qF	CACCCTCCCTTCTTCGATAATG
p16_qR	TTAGACGCTGATGTAGCTTGG
p17_qF	CAAGTCTGGCGTATTTGCATTG
p17_qR	ACACCACTGGCCAAACAA
p18_qF	ACAGGTAGACATGTCCATTGATCC
p18_qR	CCACAGCACTGTTGCAATGA
p19_qF	CCGGTGGCTTCTCTCAAG
p19_qR	CTGGTTCTCCAGAACAAAGGA
